# ABSTRACTS

Presented at the 22<sup>nd</sup> Annual Meeting of the  
**American Neuropsychiatric Association**

March 23-26, 2011  
The Westin Denver Downtown

denver, colorado

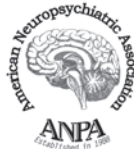

## American Neuropsychiatric Association

### 2011 Executive Committee

#### President

Daniel R. Wilson, M.D., Ph.D., FANPA

#### President Elect

Sheldon Benjamin, M.D., FANPA

#### Immediate Past President

Paula T. Trzepacz, M.D., FANPA

#### Treasurer

C. Edward Coffey, M.D., FANPA

## ANPA Scientific Program

### Committee Members and Reviewers

**Chair:** Miles G. Cunningham, M.D., Ph.D.

**Vice Chair:** Clark Alan Anderson, M.D.

Robert A. Bornstein, Ph.D., FANPA

Kristin Brousseau, D.O.

Tiffany Chow, M.D., FANPA

James D. Duffy, M.D., FANPA

Omar Ghaffar, M.D.

Robin A. Hurley, M.D., FANPA

Mario F. Mendez Ashla, M.D., Ph.D.

Evan D. Murray, M.D.

R. Andrew Sewell, M.D.

David A. Silbersweig, M.D.

Daniel R. Wilson, M.D., Ph.D., FANPA

## Awards Presented

at the 22<sup>nd</sup> Annual Meeting of the American Neuropsychiatric Association

### Fellow of the American Neuropsychiatric Association

The designation of Fellow of the American Neuropsychiatric Association recognizes significant contributions to the field of neuropsychiatry, behavioral neurology, neuropsychology or the clinical neurosciences and to the Association.

The individuals elected as a Fellow of ANPA in 2011 are:

**Clark A. Anderson, M.D.**

**Miles G. Cunningham, M.D., Ph.D.**

**Mario F. Mendez, M.D., Ph.D.**

### Career Development Award

The ANPA Career Development Award Program recognizes an advanced trainee in neuropsychiatry, behavioral neurology or neuropsychology whose accomplishments during training offer promise of a successful career in neuropsychiatry and the clinical neurosciences.

The Career Development 2011 Awardee is:

**Joan A. Camprodon, M.D., M.P.H., Ph.D.**

### Young Investigator Award

The ANPA Young Investigator Award recognizes early trainees who are embarking on promising careers in the clinical neurosciences. The recipients are chosen from the submitted presentations at the Annual Meeting. The decisions are based on the quality of the abstract submission and, more broadly, the candidate's perceived ability to make a contribution to the field with the encouragement and support provided by the award.

The Young Investigator 2011 Awardees are:

**Asli Demirtas-Tatlidede, M.D.**

**Simon Ducharme, M.D.**

**Lindsey Kirsch Darrow, Ph.D.**

### Career Achievement Award

The ANPA Career Achievement Award is in recognition of significant contributions to the field of neuropsychiatry and to the Association.

The Career Achievement 2011 Awardee is:

**Kenneth H. Bryant, M.D.**

Full text of all abstracts presented at the meeting accompanies the online edition of this issue at <http://neuro.psychiatryonline.org/cgi/content/full/23/2/dc1>

Abstracts should be cited in the following format:

Author name(s): Title of abstract (abstract #), in Abstracts Presented at the 22nd Annual Meeting of the American Neuropsychiatric Association. *J Neuropsychiatry Clin Neurosci* 2011; 23:228-232 (available online at <http://neuro.psychiatryonline.org/cgi/content/full/23/2/dc1>).

## POSTER SESSION

March 24, 2011, 3:45-5:15 PM

- 
- |                                                                                                                                                                                                                                                                                                                                                                                                                                                                                                                                                                                                                                                                                                                                                                                                                                                                                                                                                                                                                                                                                                                                                                                                                                                                                                                                                                                                                                                                                                                                                                                                                                                                                                  |                                                                                                                                                                                                                                                                                                                                                                                                                                                                                                                                                                                                                                                                                                                                                                                                                                                                                                                                                                                                                                                                                                                                                                                                                                                                                                                                                                                                                                                                                                                                                                                                                                                                                          |
|--------------------------------------------------------------------------------------------------------------------------------------------------------------------------------------------------------------------------------------------------------------------------------------------------------------------------------------------------------------------------------------------------------------------------------------------------------------------------------------------------------------------------------------------------------------------------------------------------------------------------------------------------------------------------------------------------------------------------------------------------------------------------------------------------------------------------------------------------------------------------------------------------------------------------------------------------------------------------------------------------------------------------------------------------------------------------------------------------------------------------------------------------------------------------------------------------------------------------------------------------------------------------------------------------------------------------------------------------------------------------------------------------------------------------------------------------------------------------------------------------------------------------------------------------------------------------------------------------------------------------------------------------------------------------------------------------|------------------------------------------------------------------------------------------------------------------------------------------------------------------------------------------------------------------------------------------------------------------------------------------------------------------------------------------------------------------------------------------------------------------------------------------------------------------------------------------------------------------------------------------------------------------------------------------------------------------------------------------------------------------------------------------------------------------------------------------------------------------------------------------------------------------------------------------------------------------------------------------------------------------------------------------------------------------------------------------------------------------------------------------------------------------------------------------------------------------------------------------------------------------------------------------------------------------------------------------------------------------------------------------------------------------------------------------------------------------------------------------------------------------------------------------------------------------------------------------------------------------------------------------------------------------------------------------------------------------------------------------------------------------------------------------|
| <p>P1. The Relationship Between Cognitive Impairment and Placebo Response<br/><i>C. Anderson, Caitlin Dufault, David Arciniegas</i></p> <p>P2. Mini-Mental State Examination and Frontal Assessment Battery Scores Predict Inpatient Rehabilitation Outcomes after Traumatic Brain Injury<br/><i>David Arciniegas, Kimberly Frey, Hal Wortzel, Peter Wagner, Jody Newman, C. Anderson</i></p> <p>P3. Neuropsychiatric Sequelae of Hypoxic-ischemic Brain Injury: a Pilot Study<br/><i>Beatriz Castaño, Alberto García-Molina, Monsterrat Bernabeu, Teresa Roig-Rovira, David Arciniegas</i></p> <p>P4. Epileptic Seizures<br/><i>Gaston Baslet, Eric Prenskey, Angela Roiko, Amanda Uliaszek, Pavan Prasad</i></p> <p>P5. Cyclosporine Reduces Alcohol Consumption Independent of Sucrose Consumption in c57bl Mice<br/><i>Thomas Beresford</i></p> <p>P6. Experience with the Severity of Ethanol Withdrawal Scale (SEWS) in Recognizing Early Withdrawal: a Contrast with the CIWA-A<br/><i>Thomas Beresford</i></p> <p>P7. Four Dimension (4D) Change in Brain Substructure Volumes Among Alcohol Dependent Subjects<br/><i>Thomas Beresford</i></p> <p>P8. Three Dimension (3D) to Four Dimension (4D) Comparisons in Measuring Brain Volumes Among Alcohol Dependent and Control Subjects<br/><i>Thomas Beresford</i></p> <p>P9. The Course of Neuro-endocrine Healing from Alcohol Dependence<br/><i>Thomas Beresford</i></p> <p>P10. Catechol-o-methyltransferase Genotype in Respect to Depression and Adaptation in Cancer Patients<br/><i>Thomas Beresford</i></p> <p>P12. Impulsivity, Habit and Addiction in Online College Gamblers<br/><i>Deborah Black, D. William Jolley</i></p> | <p>P13. Possible ADHD in a Child with Agenesis of the Corpus Callosum<br/><i>Adam Bloom, Glen Getz, Hannah Schofield</i></p> <p>P14. Aricept Withdrawal Treated with Lexapro<br/><i>Brad Bobrin</i></p> <p>P15. Frontal Temporal Dementia Presenting with Psychotic Depression, Polydipsia, Hyponatremia and Pathological Lying<br/><i>Brad Bobrin</i></p> <p>P16. The Effect of Odor Cues on Declarative Memory in Adolescents.<br/><i>Liam James Campbell</i></p> <p>P17. PTSD After TBI: Neural Mechanisms, Neuropsychiatric Manifestations and the Diagnostic Consequences of Proposed DSM-5 Criteria<br/><i>Christopher Davidson, David Whaley</i></p> <p>P18. Correlative Neuropsychiatric Symptoms with Anterior Cingulum Lesions Demonstrated by Diffusion Tensor Imaging<br/><i>Yazmin de la Garza-Neme</i></p> <p>P19. Crossed Aphasia in a Dextral Patient with Logopenic/Phonological Variant of Primary Progressive Aphasia<br/><i>Asli Demirtas-Tatlidede, Hakan Gurvit, Oget Oktem-Tanor, Murat Emre</i></p> <p>P20. Attention Deficit (Hyperactivity) Disorder: The Effect of Psychostimulants With or Without Atypical Neuroleptic use on Comorbid Anxiety<br/><i>Drake Duane, Brittany DiVito, Erik Bakken</i></p> <p>P21. Structural Differences in Emotional Brain Centers Associated With Joint Hypermobility: A Vulnerability Phenotype to Anxiety Disorders<br/><i>Jessica Eccles, Felix Beacher, Marcus Gray, Catherine Jones, Ludovico Minati, Neil Harrison, Hugo Critchley</i></p> <p>P22. Challenging Neuropsychiatry Case of Depression, Hallucinations, Traumatic Brain Injury, Alcohol Dependence, and Cognitive Impairment<br/><i>Donald Eknayan</i></p> |
|--------------------------------------------------------------------------------------------------------------------------------------------------------------------------------------------------------------------------------------------------------------------------------------------------------------------------------------------------------------------------------------------------------------------------------------------------------------------------------------------------------------------------------------------------------------------------------------------------------------------------------------------------------------------------------------------------------------------------------------------------------------------------------------------------------------------------------------------------------------------------------------------------------------------------------------------------------------------------------------------------------------------------------------------------------------------------------------------------------------------------------------------------------------------------------------------------------------------------------------------------------------------------------------------------------------------------------------------------------------------------------------------------------------------------------------------------------------------------------------------------------------------------------------------------------------------------------------------------------------------------------------------------------------------------------------------------|------------------------------------------------------------------------------------------------------------------------------------------------------------------------------------------------------------------------------------------------------------------------------------------------------------------------------------------------------------------------------------------------------------------------------------------------------------------------------------------------------------------------------------------------------------------------------------------------------------------------------------------------------------------------------------------------------------------------------------------------------------------------------------------------------------------------------------------------------------------------------------------------------------------------------------------------------------------------------------------------------------------------------------------------------------------------------------------------------------------------------------------------------------------------------------------------------------------------------------------------------------------------------------------------------------------------------------------------------------------------------------------------------------------------------------------------------------------------------------------------------------------------------------------------------------------------------------------------------------------------------------------------------------------------------------------|

- P23. EEG and Quantitative EEG Data as an Adjunct to Clinical Assessment Predicts Response to Atypical Treatment Options  
*Hamlin Emory, Mark Shatsky, Christopher Wells*
- P24. Delusional Parasitosis  
*Richard Ferrell, Thomas McAllister*
- P25. Traumatic Brain Injury and Meditation  
*Roger Fox*
- P26. A Case of HIV Dementia  
*Mandy Garber, Emily Vaughn*
- P27. Primary Progressive Aphasia in a Bilingual Female: Dissociation Between Primary and Secondary Language Degradation  
*Eric Gausche, Neil Pliskin, Moises Gaviria*
- P28. A Volumetric and Diffusion Tensor MRI Study of APOE  $\epsilon 4$  in Multiple Sclerosis  
*Omar Ghaffar*
- P29. Relationship Maintenance in Couples with a Partner Who Has Attention Deficit Hyperactivity Disorder  
*Rachel Gilbert, Kim Gorgens*
- P31. Successful Use of Mirror Therapy for Phantom Limb Pain in the Intensive Care Unit  
*Colin Harrington, Nicholas Carter*
- P32. Acupressure's Efficacy as a Non-Pharmacological Intervention for Traumatic Brain Injury (TBI)  
*Theresa Hernández, Kristina McFadden, Kyle Healy, Miranda Dettmann, Jesse Kaye, Tiffany Ito, D. Distel, Nathan Faes*
- P33. Biomarker Positive and Negative Subjects in the Alzheimer's Disease Neuroimaging Initiative: Clinical Characterization  
*Richard Kennedy, Lon Schneider, Gary Cutter*
- P34. From Clinical Research to Clinical Practice: Neuroimaging in Dementia  
*Jill Kowalski, Moises Gaviria, Sandra Horowitz*
- P35. A Population-Based Investigation of the Association of Hippocampal Volume with Depressive Symptoms: Striving Towards a Definitive Answer  
*Yingying Kumar, Yonas Geda, Stephen Weigand, Scott Przybelski, K. Kantarci, Ronald Petersen, Clifford Jack*
- P36. Diagnostic and Treatment Challenges in Patients with Traumatic Brain Injury  
*Margo Lauterbach, Paula Notarangelo, Vassilis Koliatsos*
- P37. Catatonic Behavior in Dementia with Depression  
*Eliot Licht, Joan Scheibel, Mario Mendez*
- P38. Neurological Lesions Associated with Pedophilic Behavior  
*Mario Mendez, Jill Shapira, Ronald Saul*
- P40. Innate Immune Activation in Pediatric Autoimmune Neuropsychiatric Disorders Associated with Streptococcal Infections (PANDAS)  
*Tanya Murphy, Maliena Longley, Morna Dorsey, Elena Perez, Panida Sriaroon, John Sleasman*
- P41. Immune-Related Risks in Children Presenting with OCD and Tics  
*Tanya Murphy, Susan Swedo, Kytja Voeller, Madeleine Cunningham*
- P42. Neuropsychological Implications of Attention Deficit/Hyperactivity Disorder in an Adult with Multiple Sclerosis and Mood Disorder  
*Allison Myers, John King*
- P43. Neurotherapy of Attention Deficit/Hyperactivity Symptoms  
*David Nelson, Mary Esty*
- P44. Neurocognitive Discrepancies between Autism and Asperger's Beyond Language  
*Chad Noggle, Pravesh Basnet, Aman Mahjan, Johnathan Yost, Aghaegbulam Uga, Trinadha Pilla, Raymond Dean*
- P45. Relative Impact of Comorbid Depression and/or Anxiety following Closed Head Injury  
*Chad Noggle, Aghaegbulam Uga, Trinadha Pilla, Gaurav Jain, Subodh Jain, Lokesh Shahani, Raymond Dean*
- P46. Is There Such a Thing as Pseudo-Mild Cognitive Impairment? Exploring Cognition in Middle-aged Depression  
*Chad Noggle, Subodh Jain, Lokesh Shahani, Pravesh Basnet, Aman Mahjan, Johnathan Yost, Raymond Dean*
- P47. Methotrexate-Induced Toxicity Plus or Minus Cerebral Radiation: A Qualitative Comparison of Two Pediatric ALL Cases  
*Chad Noggle, Gaurav Jain, Subodh Jain, Lokesh Shahani, Pravesh Basnet, Aman Mahjan*
- P48. Memory Functioning in a Sample of Referred Patients with Fibromyalgia: An Exploratory Approach  
*Chad Noggle, Lokesh Shahani, Pravesh Basnet, Aman Mahjan, Johnathan Yost, Aghaegbulam Uga, Jon Thompson*
- P49. Does Sex affect the Risk of Psychiatric Symptoms Emerging Following Neurological Insult? An Exploratory Analysis  
*Chad Noggle, Trinadha Pilla, Gaurav Jain, Subodh Jain, Lokesh Shahani, Pravesh Basnet, Anya Mazur-Mosiewicz, Beth Trammell, Raymond Dean*
- P50. Covariance of Sensory-Motor and Cognitive Profiles in a Sample of Pervasive Developmental Disorders  
*Chad Noggle, Johnathan Yost, Aghaegbulam Uga, Trinadhan Pilla, Gaurav Jain, Subodh Jain, Raymond Dean*

- P51. Does the F-scale of the MMPI-2 Predict Outcomes on Validity Measures in Neuropsychological Assessment? Links between Cognitive and Psychiatric Malingering  
*Chad Noggle, Aman Mahjan, Johnathan Yost, Aghaegbulam Uga, Trinadha Pilla, Gaurav Jain, Jon Thompson*
- P52. Longitudinal Analysis of Fractional Anisotropy in Patients with Mild Cognitive Impairment and Alzheimer's Disease  
*Milap Nowrangi, Michelle Mielke, Constantine Lyketsos, Marilyn Albert, Gwenn Smith, Kenichi Oishi, Susumu Mori*
- P53. Changes in Motor Evoked Potentials Associated with Fatigue are Related to Central Motor Initiation  
*Candace Palmer, William Triggs, Benzi Kluger*
- P54. Prevention of Anxiety Disorder Following Stroke  
*Robert Robinson, Katsunaka Mikami, Mijin Jang, Ricardo Jorge*
- P55. A Case Report of Abnormally Small Hippocampi in a Patient with Mild Traumatic Brain Injury  
*David Ross, Alfred Ochs, Jan Seabaugh, Tim Henshaw*
- P56. Self-Administered Screening Uncovers Mild Cognitive Impairment and Dementia Among Community Dwelling Seniors  
*Douglas Scharre, Shu-Ing Chang, Andrew Levin, Haikady Nagaraja*
- P57. A Rare Case of Breast Cancer in a Male Patient on Long Term Atypical Antipsychotics  
*Lokesh Shahani*
- P58. Antibiotics-Induced Psychosis: Updates on Tetracycline  
*Lokesh Shahani*
- P59. Temporal Lobe Epilepsy: Revisiting Gastaut – Geschwind Syndrome  
*Lokesh Shahani*
- P60. Utilization of a Comprehension Assessment to Confirm Informed Consent for Research in Depressed Patients who have Started Electroconvulsive Therapy  
*Christopher Sola, Mark Frye, Maria Lapid, Lisa Seymour, Elizabeth Scilley*
- P61. OEF/OIF Veterans with mild TBI Following Exposure to Primary Blast Forces: Neurological Soft Signs  
*Katherine Taber, Susan Hurt, Kimberly Gordon, Robin Hurley*
- P62. Maine Infants at Risk Project  
*Paul Tisher, Jonathan Paul, Beth Matano, Ramesh Krishnan, Nicole Heller, Mark Brown*
- P63. Longitudinal Study of Delirium Phenomenological and Neuropsychological Profile Using Mixed-Effects Regression Modelling  
*Paula Trzepacz, , Maeve Leonard, Claire Jordan, Jean Saunders, Dimitrios Adamis, David J. Meagher*
- P64. Impulsivity, Apathy, and Executive Dysfunction in a Patient with Multiple Potential Etiologies  
*Sandeep Vaishnavi, Chad Forbes, Thomas Gualtieri*
- P65. Attentional Impairment Does Not Predict Response to Phonological Awareness Treatment or Concomitant Improvement in Rapid Automatized Naming  
*Kytja Voeller, Kimberly Ward, Jean Riordan, Jill Aloia*
- P66. No Words for Feelings: The Emotional Word Fluency Test  
*Kytja Voeller, Josh Morris, Jill Aloia, Jean Riordan, Alex Masi*
- P67. Neuropsychiatric Patients' Association (NPA)  
*Hugh Mirolo, Heather Watkins, Karlah Nofle*
- P68. Successful Use of Right Ultra-brief Electroconvulsive Therapy for the Treatment of Catatonia, Psychotic Depression, and Motor Fluctuations Associated with Advanced Idiopathic Parkinson's Disease  
*Nolan Williams, Carol Burns, Venessa Hinson, Baron Short, Ziad Nahas*
- P69. Cognitive Deficits Following Breast Cancer Chemotherapy: A Case of Severe "Chemo Brain"  
*Michael Ziffra*

## PLATFORM SESSIONS

March 26, 2011, 9:00 AM – 12:15 PM

### Current Neuropsychiatry – Clinical

1. Foix-Chavany-Marie Syndrome and Akinetic Mutism After Traumatic Brain Injury  
*Davin Quinn*
2. Hypokinetic Mute Behavior in a Patient with Schizophrenia and Encephalopathy  
*Colin Harrington*
3. Assessing Neuropsychiatric Disturbances Associated with Aphasia: A Case Report  
*Kimberly Frey, Jody Newman, C. Anderson, David Arciniegas*
4. Pathological Stealing in Frontotemporal Dementia  
*Mario Mendez, Jill Shapira, Ronald Saul*
5. No Longer Diagnosed with Bipolar Disorder: Early Intervention for Language Dysfunction Significantly Improves Behavioral Functioning in Children  
*Kytja Voeller, Jill Aloia, Jean Riordan*

6. Antiphospholipid Syndrome Induced Delirium Misdiagnosed as Post-Partum Psychosis in a 17 year-old Hmong Female  
*Scott Carroll*
7. Wernicke Encephalopathy in a Non-Alcoholic Patient with Metastatic CNS Lymphoma and New Onset Occipital Lobe Seizures: A Case Report  
*Jeremy Gregory, Amit Chopra*
8. Clock Drawing Performance Predicts Inpatient Rehabilitation Outcomes after Traumatic Brain Injury  
*Hal S. Wortzel, Peter J. Wagne, Kimberly L. Frey, C. Alan Anderson, David B. Arciniegas*
9. Postpartum Catatonia: Review of Etiology, Assessment and Therapeutics  
*Christopher Davidson, David Whaley*
10. Treating the Patient, Not the Scan: Two Patients with Psychogenic Parkinsonism in Spite of Abnormal PET Scans  
*Daniel Schneider, Stanley Fahn*
11. Comparison of psychogenic movement disorders and psychogenic non-epileptic seizures: is phenotype clinically important?  
*Cynthia Stonnington, Erika Driver-Dunckley, Dona Locke, Katherine Noe*
12. Theory of Mind in Tourette Syndrome  
*Clare Eddy, Ian Mitchell, Sarah Beck, Andrea Cavanna, Hugh Rickards*
5. Cortical Thickness Correlates of Attention Problems in a Large Scale Representative Cohort of 4 to 18 Year-Old Healthy Children Without ADHD  
*Simon Ducharme, James Hudziak, Kelly Botteron, Matthew Albaugh, Claude Lepage, Alan Evans, Sherif Karama*
6. Testosterone-Related Sex Differences in Cortical Thickness in the Developing Human Brain  
*Tuong-Vi Nguyen, Simon Ducharme, Kelly Botteron, James McCracken, Megan Mahabir, Alan Evans, Sherif Karama*
7. Mapping Pleasure Pathways: the Functional Connectivity of the Nucleus Accumbens  
*Andrea Cavanna*
8. Safety and Proof of Principle Study of Cerebellar Vermal Theta Burst Stimulation in Refractory Schizophrenia  
*Asli Demirtas-Tatlidede, Caterina Freitas, Jennifer Cromer, Laura Safar, Dost Ongur, William Stone, Larry Seidman, Jeremy Schmahmann, Alvaro Pascual-Leone*
9. Safety of Transcranial Direct Current Stimulation in Childhood-Onset Schizophrenia  
*Anandraj Mattai, Rachel Miller, Brian Weisinger, Deanna Greenstein, Jennifer Bakalar, Eric Wassermann, Judith Rapoport, Nitin Gogtay*
10. Simultaneous TMS and fMRI to Study Mechanisms of Hemispatial Neglect Recovery and Strategies for Therapeutic Neuromodulation  
*Joan Camprodon, Alex Sack, Alvaro Pascual-Leone*
11. Anterior Cingulate Cortex: Understanding its Role in Neuropsychiatric Illness  
*Francis Stevens, Katherine Taber, Robin Hurley*
12. Delirium Phenomenology In Rehabilitation and Palliative Care Cohorts Using Factor Analysis of the Delirium Rating Scale - Revised-98  
*Malene Abell, Jacob Kean, Paula Trzepacz, David Meagher*

## Current Neuropsychiatry – Research

1. Neuropsychiatric Predictors of the Transition from Mild Cognitive Impairment (MCI) to Incident Dementia  
*Yonas Geda, Rosebud Roberts, David Knopman, V. Pankratz, Ronald Petersen*
2. Delayed P300 Latency and Voltage in 85 Patients with and Without Hypometabolic PET Scans  
*Eric Braverman*
3. Apathy and Cognition in Non-demented Parkinson's Disease: Apathy's Unique Contribution to Executive Functioning  
*Lindsey Kirsch-Darrow, Laura Zahodne, Michael Marsiske, Michael Okun, Russell Bauer, Dawn Bowers*
4. Combination of Preserved Amygdala Volume and Anterior Cingulate Atrophy is Associated with Anxiety in Alzheimers Disease  
*Stephane Poulin*



# American Neuropsychiatric Association

The American Neuropsychiatric Association (ANPA), established in 1988, is an organization of professionals in neuropsychiatry, behavioral neurology, neuropsychology and the clinical neurosciences. Our mission is to improve the lives of people with disorders at the interface of psychiatry and neurology.

The strength of the organization is our diversity of membership, which is comprised of professionals all areas of neuroscience who share clinical and/or academic interests in neuropsychiatry. The interdisciplinary nature of the membership encourages collaboration among educators, clinicians, researchers, students and trainees in research presentations, symposia, workshops and/or continuing education courses. *The Journal of Neuropsychiatry and Clinical Neurosciences (JNCN)* is the official publication of the organization, and is a benefit of membership.

ANPA holds an annual scientific meeting and provides up to 30 CME/CE credits. Members are encouraged to submit their work for presentation at these annual meetings. Travel awards are available for promising young investigators. Annual meeting abstracts and proceedings are published in *JNCN*.

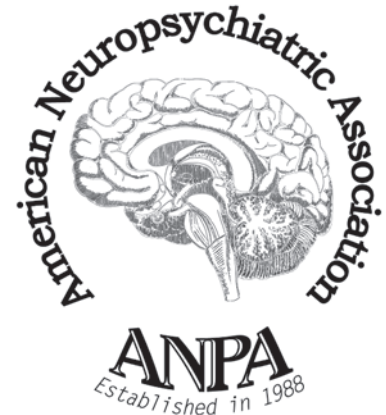

## Contact Information

Website:  
[www.anpaonline.org](http://www.anpaonline.org)

Email:  
[anpa@osu.edu](mailto:anpa@osu.edu)

Phone:  
614-447-2077

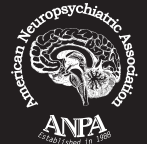

## Join ANPA Now!

Don't miss ANPA's 23<sup>rd</sup>  
Annual Meeting

Sheraton New Orleans Hotel  
New Orleans, Louisiana

March 21-24, 2012

## Benefits of Membership

- Subscription to *The Journal of Neuropsychiatry and Clinical Neurosciences (JNCN)*
- Discounted membership and meeting registration fees for trainees
- Collaboration in clinical, educational and research activities and the opportunity to interact with senior colleagues
- Opportunity to participate on committees and in the future leadership of ANPA
- Opportunity to participate in on-line forums for discussion of research, clinical cases and/or current issues related to neuropsychiatric practice
- Opportunity to join Special Interest Groups for members who have common interests in specific research, clinical cases, practice issues or educational areas
- Discount on subscriptions to PsychiatryOnline.com including DSM Premium and DSM Premium Plus
- Opportunity for presentation at the annual meeting with accepted abstracts published in the *JNCN*
- Significantly reduced registration fees at the annual meeting
- Newsletters, news updates, information on job and training opportunities, research and meeting information on the ANPA web site: [www.anpaonline.org](http://www.anpaonline.org)

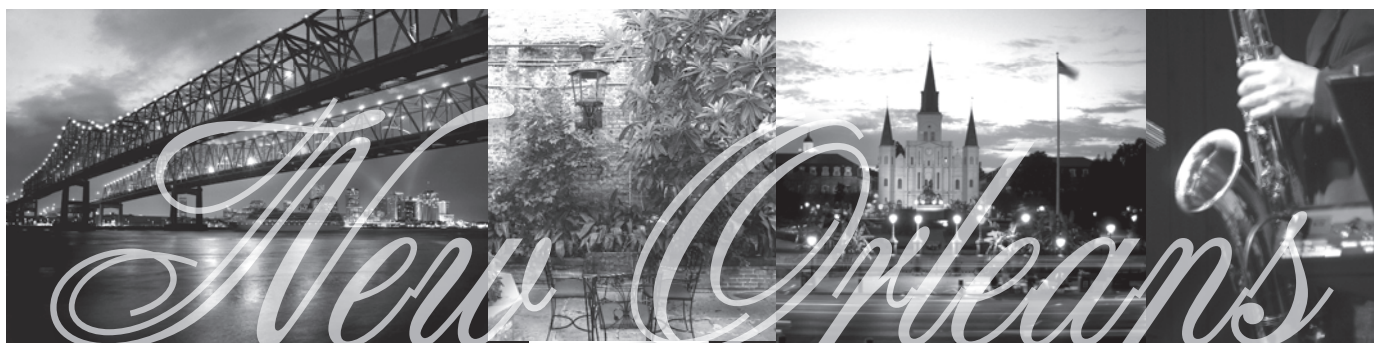

Join online at: [www.anpaonline.org](http://www.anpaonline.org)



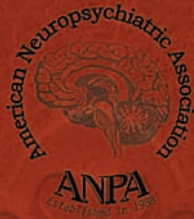

## 23<sup>rd</sup> Annual Meeting American Neuropsychiatric Association

# Meeting Announcement & call for abstracts

You are invited to submit abstracts reporting new research or challenging clinical cases for poster or platform presentations.

Abstracts presented at the meeting will be published on-line in the spring 2012 issue of the *Journal of Neuropsychiatry and Clinical Neurosciences*.

Several types of awards are made in conjunction with abstracts accepted for presentation at the 23<sup>rd</sup> Annual Meeting of the Meeting of the American Neuropsychiatric Association.

Prior to submitting abstracts, please refer to our website for more information about these awards.

**Deadline for receipt of abstracts is October 25, 2011.**

Complete submission instructions will be available July 1, 2011 at: [www.anpaonline.org](http://www.anpaonline.org)

Meeting information can be found on the ANPA web site: [www.anpaonline.org](http://www.anpaonline.org) as it becomes available.

## March 21-24, 2012

For more information contact the American Neuropsychiatric Association office:  
700 Ackerman Road, Suite 625 • Columbus, Ohio USA 43202 • Phone: 614-447-2077 • E-mail: [anpa@osu.edu](mailto:anpa@osu.edu)

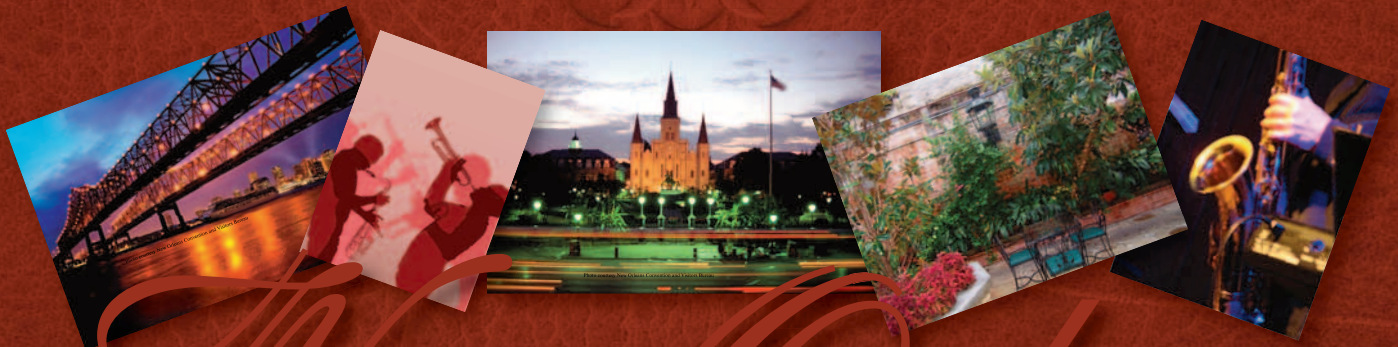

# New Orleans

Sheraton New Orleans Hotel • 500 Canal Street • New Orleans, LA 70130
