# THE JOURNAL OF NEUROPSYCHIATRY and Clinical Neurosciences

The Official Journal of the American Neuropsychiatric Association

## In this issue:

- FDA Perspective on the DSM-V Approach to Classification of “Cognitive” Disorders
- The Spectrum of Sociopathy in Dementia
- Transcutaneous Electrical Stimulation (TENS) for Psychogenic Movement Disorders
- Relationship Between Corpus Callosum Abnormalities and Schneiderian First-Rank Symptoms in Antipsychotic-Naïve Schizophrenia Patients
- Temporary Interruption of Deep Brain Stimulation for Parkinson’s Disease During Outpatient Electroconvulsive Therapy for Major Depression: A Novel Treatment Strategy

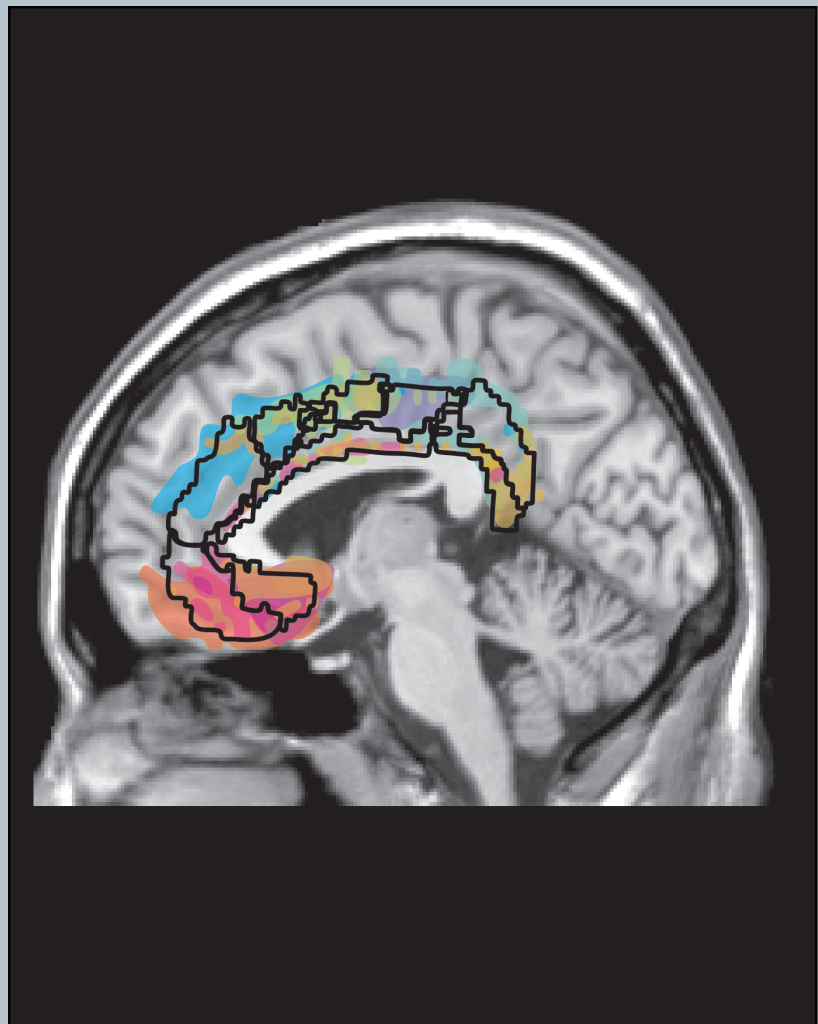

Source: https://psychiatryonline.org/doi/suppl/10.1176/jnp.2011.23.issue-2/suppl_file/cover.pdf
