THE  
JOURNAL OF  
NEUROPSYCHIATRY

and Clinical Neurosciences

VOLUME 23 • NUMBER 2 • SPRING 2011

---

WINDOWS TO THE BRAIN

- iv Anterior Cingulate Cortex: Unique Role in Cognition and Emotion  
*Francis L. Stevens, Ph.D., Robin A. Hurley, M.D.,  
Katherine H. Taber, Ph.D.*

---

SPECIAL ARTICLES

- 126 FDA Perspective on the DSM-5 Approach to Classification of  
“Cognitive” Disorders  
*Thomas Laughren, M.D.*

---

REGULAR ARTICLES

- 132 The Spectrum of Sociopathy in Dementia  
*Mario F. Mendez, M.D., Ph.D., Jill S. Shapira, R.N., Ph.D.,  
Ronald E. Saul, M.D.*
- 141 Transcutaneous Electrical Stimulation (TENS) for Psychogenic  
Movement Disorders  
*Joseph Ferrara, M.D., William Stamey, M.D., Adriana M. Strutt, Ph.D.,  
Octavian R. Adam, M.D., Joseph Jankovic, M.D.*
- 149 Engaging in Cognitive Activities, Aging, and Mild Cognitive  
Impairment: A Population-Based Study  
*Yonas E. Geda, M.D., M.Sc., Hillary M. Topazian, Robert A. Lewis,  
Rosebud O. Roberts, M.B., Ch.B., M.S., David S. Knopman, M.D.,  
V. Shane Pankratz, Ph.D., Teresa J. H. Christianson, B.Sc.,  
Bradley F. Boeve, M.D., Eric G. Tangalos, M.D., Robert J. Ivnik, Ph.D.,  
Ronald C. Petersen, M.D., Ph.D.*
- 155 Relationship Between Corpus Callosum Abnormalities and  
Schneiderian First-Rank Symptoms in Antipsychotic-Naïve  
Schizophrenia Patients  
*Naren P. Rao, MBBS, M.D., Ganesan Venkatasubramanian, MBBS, M.D.,  
Rashmi Arasappa, MBBS, D.P.M., Bangalore N. Gangadhar, MBBS, M.D.*
- 163 Neuroendocrinal Study of Depression in Male Epileptic Patients  
*Samah Afifi, M.D., Ph.D., Wael Fadel, M.D., Heba Morad, M.D.,  
Abdo Eldod, M.D., Elsayed Gad, M.D., Cynthia L. Arfken, M.D.,  
Abou Samra, M.D., Nash Boutros, M.D.*
- 168 Neuropsychiatric Aspects of Primary Progressive Aphasia  
*Yasaman Fatemi, M.D., Bradley F. Boeve, M.D., Joseph Duffy, Ph.D.,  
Ronald C. Petersen, M.D., Ph.D., David S. Knopman, M.D.,  
Vladimir Cejka, M.D., Glenn E. Smith, Ph.D.,  
Yonas E. Geda, M.D., M.Sc.*

- 173** Differential Effects of Executive Functioning on Suicide Attempts  
*Cynthia Z. Burton, B.A., Lea Vella, M.P.H., Jennifer A. Weller, Ph.D., Elizabeth W. Twamley, Ph.D.*
- 180** Phenomenological and Neuropsychological Profile Across Motor Variants of Delirium in a Palliative-Care Unit  
*Maeve Leonard, M.D., Sinead Donnelly, M.D., Marion Conroy, M.D., Paula Trzepacz, M.D., David J. Meagher, M.D.*
- 189** Recognition of Self-Generated Facial Emotions Is Impaired in Schizophrenia  
*Caroline Demily, M.D., Ph.D., Tiffany Weiss, M.Sc., Michel Desmurget, Ph.D., Nicolas Franck, M.D., Ph.D., Jean-Yves Baudouin, Ph.D.*

---

## CLINICAL RESEARCH REPORTS

- 194** Temporary Interruption of Deep Brain Stimulation for Parkinson's Disease During Outpatient Electroconvulsive Therapy for Major Depression: A Novel Treatment Strategy  
*Simon Ducharme, M.D., Alice W. Flaherty, M.D., Ph.D., Stephen J. Seiner, M.D., Darin D. Dougherty, M.D., M.Sc., Oscar G. Morales, M.D.*
- 198** Relationships Between Multiple Sclerosis and Depression  
*Nancy Byatt, D.O., M.B.A., Anthony J. Rothschild, M.D., Peter Riskind, M.D., Ph.D., Carolina Ionete, M.D., Ph.D., Anne T. Hunt, Sc.D.*
- 201** Sleep Disturbance After Mild Traumatic Brain Injury: Indicator of Injury?  
*Vani Rao, M.D., Alyssa Bergey, B.A., Hugh Hill, M.D., David Efron, M.D., Una McCann, M.D.*
- 206** Huntington's Disease: Effect of Memantine on FDG-PET Brain Metabolism?  
*Lena Elisabeth Hjermind, M.D., Ian Law, M.D., Aia Jønch, M.D., Jette Stokholm, M.Sc., Jørgen Erik Nielsen, M.D.*
- 211** Inferential-Reasoning Impairment in Schizophrenia-Spectrum Disorders  
*Carrie L. Kruck, M. Psych., Robert M. Roth, Ph.D., Sheba R. Kumbhani, Ph.D., Matthew A. Garlinghouse, Ph.D., Laura A. Flashman, Ph.D., Thomas W. McAllister, M.D.*

- 215** Elevated Plasma Ceramides in Depression  
*Patricia Gracia-Garcia, M.D., Vani Rao, M.D.,  
Norman J. Haughey, Ph.D., Veera Venkata Ratnam Banduru, Ph.D.,  
Gwenn Smith, Ph.D., Paul B. Rosenberg, Ph.D., Antonio Lobo, M.D.,  
Constantine G. Lyketsos, M.D., Michelle M. Mielke, Ph.D.*
- 219** The Influence of Thyroid Function on Cognition in a Sample of  
Ethnically Diverse, Rural-Dwelling Women: A Project FRONTIER  
Study  
*Leigh A. Johnson, Ph.D., Valerie Hobson, M.A., Marjorie Jenkins, M.D.,  
Andrew Dentino, M.D., R. Michael Ragain, M.D., M.S. Ed.,  
Sid O'Bryant, Ph.D.*
- 223** Catatonia in Psychotic Patients: Clinical Features and Treatment  
Response  
*Mary L. England, B.S.N., R.N., Dost Öngür, M.D., Ph.D.,  
Glenn T. Konopaske, M.D., Rakesh Karmacharya, M.D., Ph.D.*

---

## DEPARTMENTS

- 131** Note of Attribution  
**227** Book Review  
**228** Abstracts Presented at ANPA Meeting  
**233** Letters

*Information for Contributors is available online at  
<http://neuro.psychiatryonline.org>*
